# Supplementary material for: On the importance of spatial scales on beta diversity of coral assemblages: a study from Venezuelan coral reefs
Source: PeerJ journal article supplement (doi:10.7717/peerj.9082), 2020-05-04
Supplement: Supp._3_Sample_Coverage_Curves.pdf [file Supp._3_Sample_Coverage_Curves.pdf]

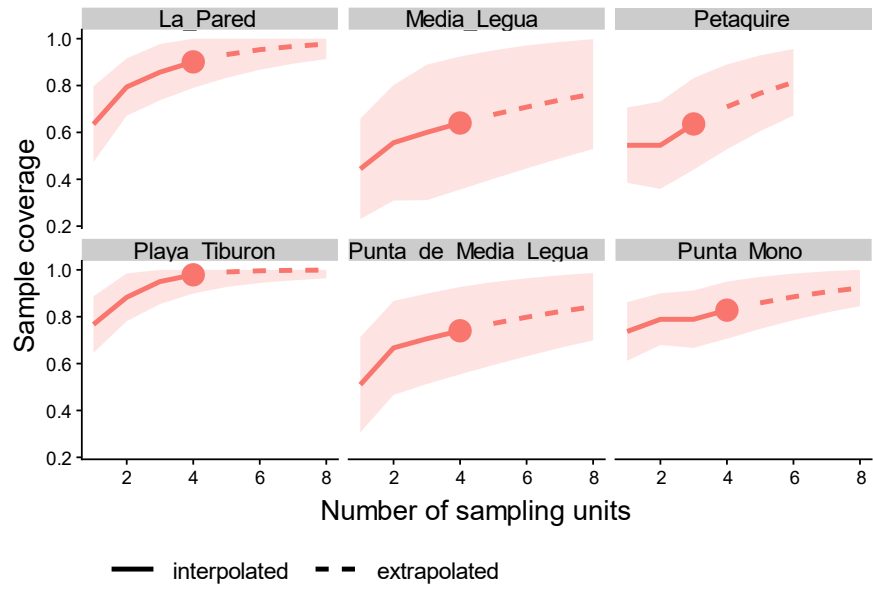

**Figure 1.** Sample coverage curves for sites from Chichiriviche de la Costa.

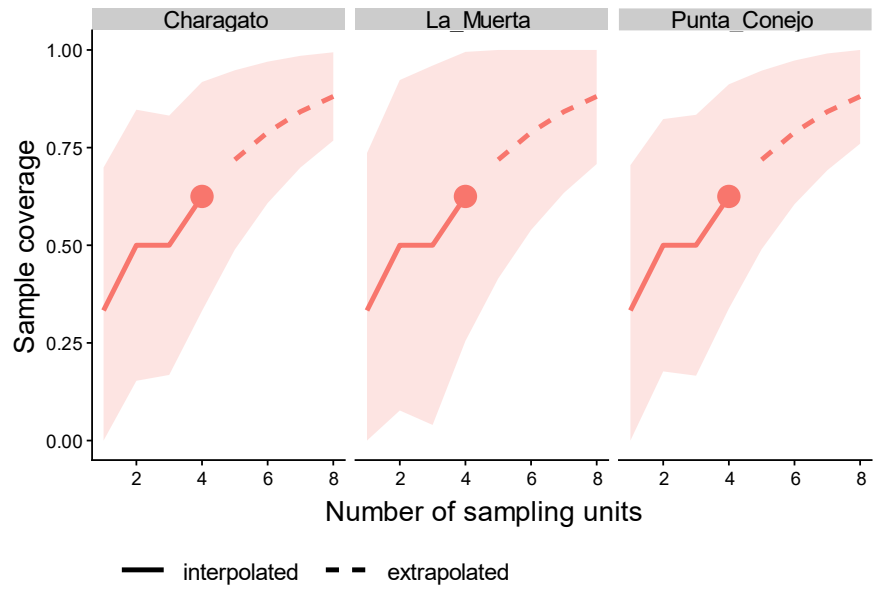

**Figure 2.** Sample coverage curves for sites from Cubagua.

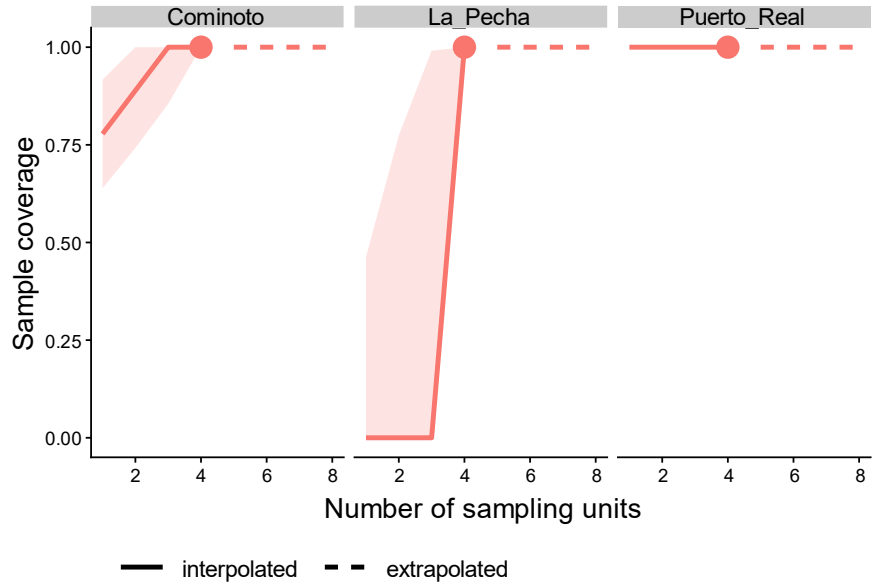

**Figure 3.** Sample coverage curves for sites from Los Frailes.

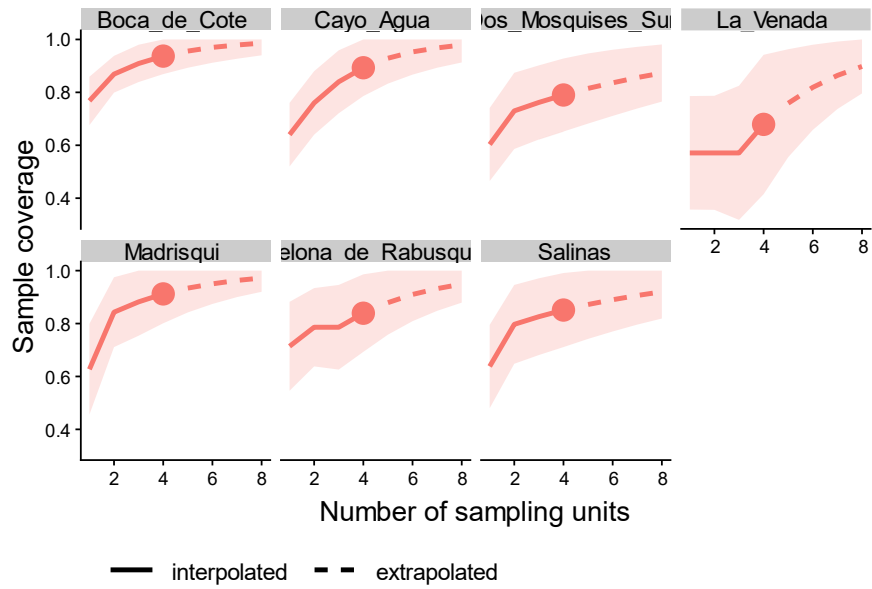

**Figure 4.** Sample coverage curves for sites from Los Roques N.P.

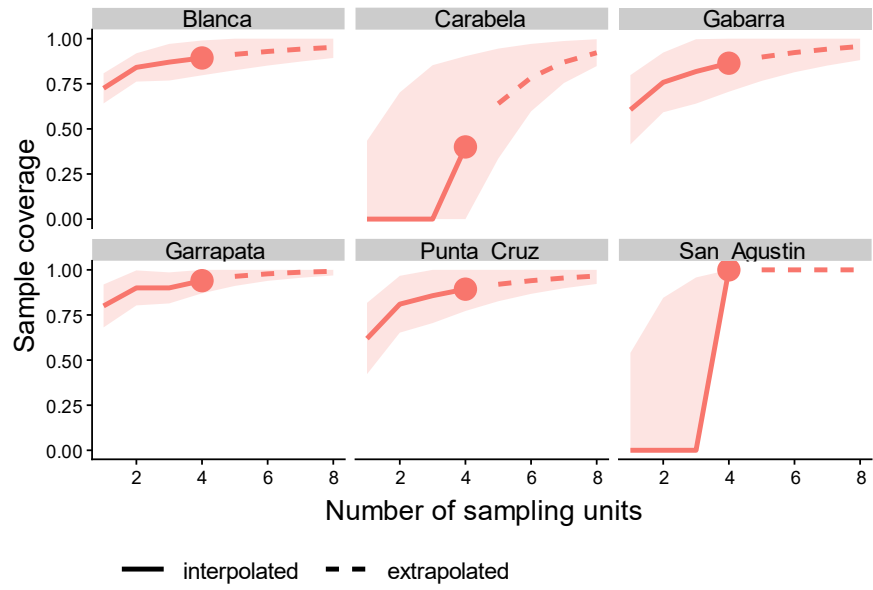

Figure 5. Sample coverage curves for sites from Mochima N.P.

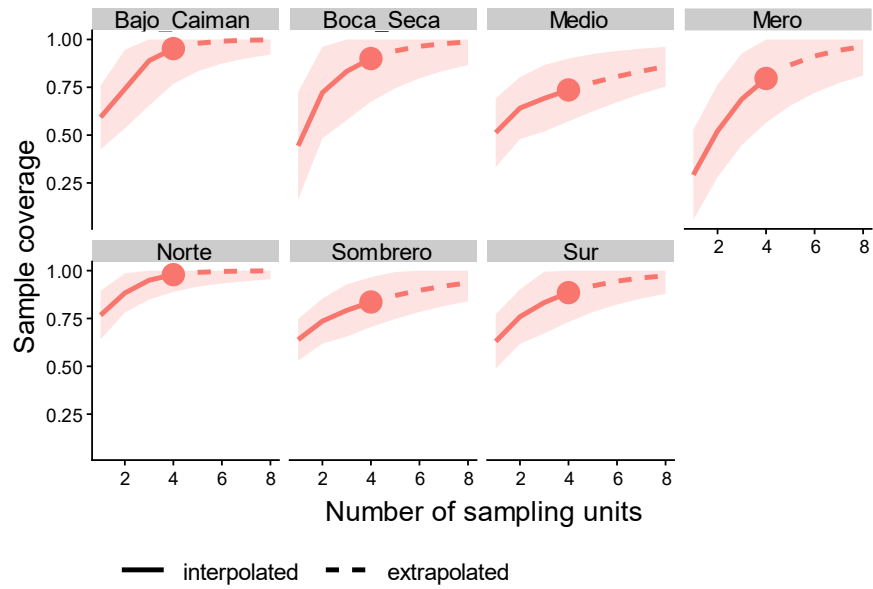

Figure 6. Sample coverage curves for sites from Morrocoy N.P.

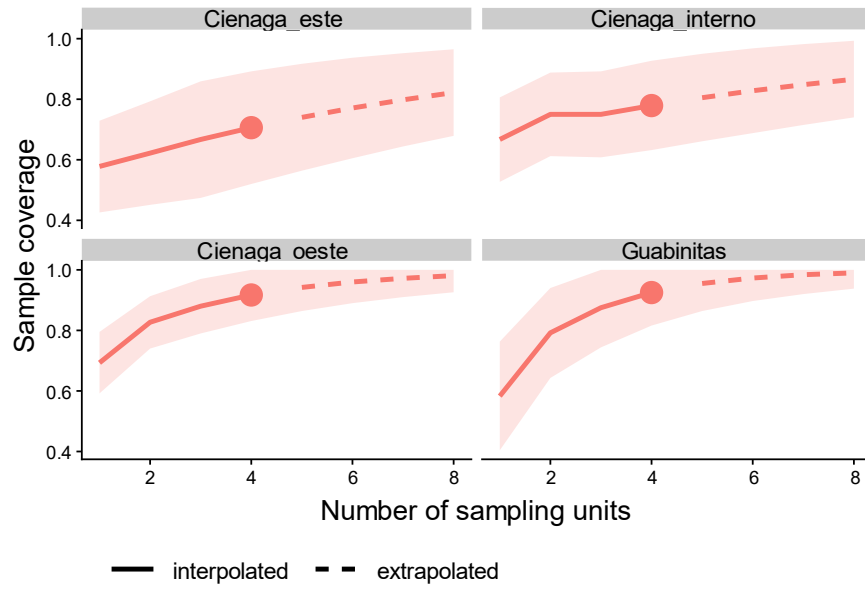

**Figure 7.** Sample coverage curves for sites from Ocumare de la Costa.
